# Supplementary material for: A series of intrinsically chiral gold nanocage structures
Source: Royal Society of Chemistry journal article supplement (doi:10.1039/c7nr02868g), 2017-01-01
Supplement: c7nr02868g1.pdf [file c7nr02868g1.pdf]

## Supporting Information

### A Series of Intrinsically Chiral Gold Nanocage Structures

Xiaojing Liu and Ian P. Hamilton\*

Department of Chemistry, Wilfrid Laurier University, Waterloo, N2L 3C5, Ontario, Canada

[\\*ihamilto@wlu.ca](mailto:ihamilto@wlu.ca)

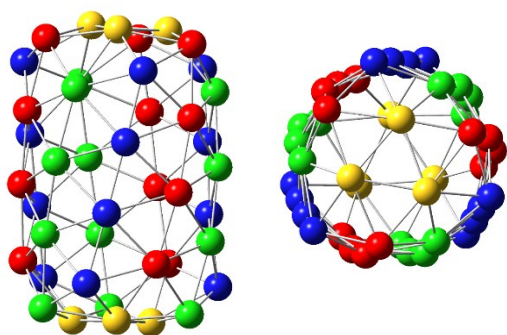

Fig. S1.  $\text{Au}_{42}$  ( $C_3$ ) with color coding to highlight the three distinct helical strands.

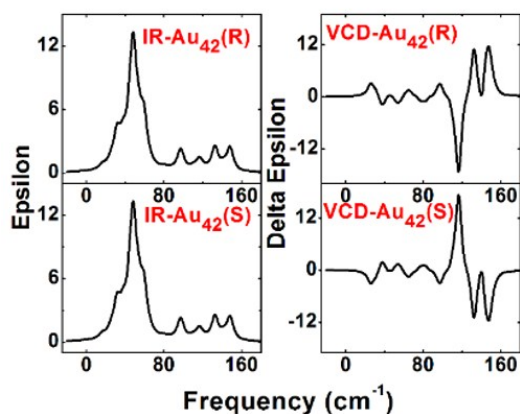

Fig. S2. IR and VCD spectra of  $\text{Au}_{42}$  ( $C_3$ ).

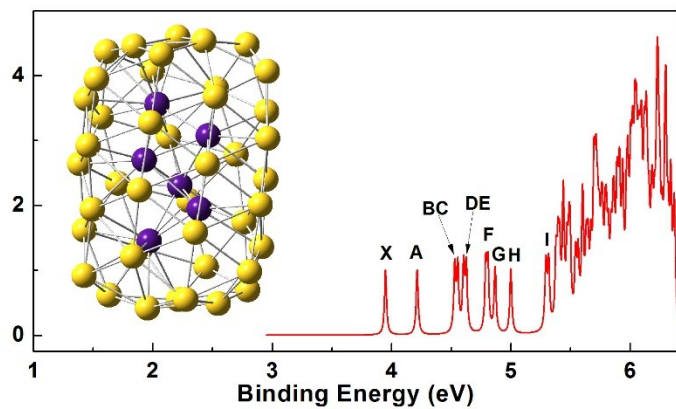

Fig. S3. Anionic Au<sub>6</sub>@Au<sub>42</sub> (C<sub>3</sub>) and its simulated PES spectrum (peak assignments are tentative).
